# Supplementary material for: Impact of fossil and non-fossil fuel sources on the molecular compositions of water-soluble humic-like substances in PM 2.5 at a suburban site of Yangtze River Delta, China
Source: Copernicus journal article supplement (doi:10.5194/acp-23-8305-2023), 2023-07-25
Supplement: Supplementary file 1 [file acp-23-8305-2023-supplement.pdf]

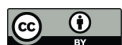

*Supplement of*

**Impact of fossil and non-fossil fuel sources on the molecular compositions of water-soluble humic-like substances in PM<sub>2.5</sub> at a suburban site of Yangtze River Delta, China**

Mengying Bao et al.

*Correspondence to:* Yan-Lin Zhang (dryanlinzhang@outlook.com)

The copyright of individual parts of the supplement might differ from the article licence.

1 **Sections**

2 **S1.** FT-ICR MS data processing

3

4 **Tables**

5 **Table S1.** Relative intensity weighted average values of number, molecular weight ( $MW_w$ ),  
6 elemental ratios ( $O/C_w$ ,  $H/C_w$ ), double-bond equivalent ( $DBE_w$ ), aromaticity index ( $AI_w$ ), and  
7  $DBE/C_w$  of different elemental category of assigned formulas in summer.

8 **Table S2.** Relative intensity weighted average values of number, molecular weight ( $MW_w$ ),  
9 elemental ratios ( $O/C_w$ ,  $H/C_w$ ), double-bond equivalent ( $DBE_w$ ), aromaticity index ( $AI_w$ ), and  
10  $DBE/C_w$  of different elemental category of assigned formulas in winter.

11 **Table S3.** Classification basis of Van Krevelen diagram.

12 **Table S4.** Statistics on S-containing compounds based on O/S in summer.

13 **Table S5.** Statistics on S-containing compounds based on O/S in winter.

14

15 **Figures**

16 **Figure S1.** 48-h backward trajectories in summer (left) and winter (right).

17 **Figure S2.** FT-ICR mass spectra of 6 samples in summer.

18 **Figure S3.** FT-ICR mass spectra of 6 samples in winter.

19 **Figure S4.** Number percentage of aliphatic ( $AI=0$ ), olefinic ( $0 < AI \leq 0.5$ ) and aromatic ( $AI > 0.5$ )  
20 formulas in CHO, CHON, CHOS and CHONS compounds in summer.

21 **Figure S5.** Number percentage of aliphatic ( $AI=0$ ), olefinic ( $0 < AI \leq 0.5$ ) and aromatic ( $AI > 0.5$ )  
22 formulas in CHO, CHON, CHOS and CHONS compounds in winter.

23 **Figure S6.** Number percentage of formulas for different carbon atom numbers (a) and total relative  
24 intensity of formulas for different carbon atom numbers (b) in CHO compounds in summer and  
25 winter.

26 **Figure S7.** Time series of the relative intensities of typical CHO compounds in biomass burning  
27 organic aerosols (BBOA) ((a), (b), (c), (d) and (e)) and the mass concentrations of levoglucosan  
28 (f).

29 **Figure S8.** Distribution of the relative intensities of OSs from different precursors.

30

31 **References**

## 32 S1. FT-ICR MS data processing

33 The molecular formulas assignment was performed using a custom software for the signals  
34 with a signal-to-noise ratio above 10 with a mass tolerance of  $\pm 1$  ppm. Each molecular formula  
35 ( $C_cH_hO_oN_nS_s$ ) contained certain elements where C, H, O, N, and S represented the element carbon,  
36 hydrogen, oxygen, nitrogen, and sulfur and c, h, o, n, and s corresponded to the number of C, H,  
37 O, N, and S atoms, respectively. Both the O/C and H/C ratios were limited to 0-3. The formulas  
38 identified which contained isotopomers (i.e.,  $^{13}C$ ,  $^{18}O$ , or  $^{34}S$ ) were not discussed in this study. The  
39 maximum number of atoms for each formula was set as 60 for  $^{12}C$ , 60 for  $^1H$ , 20 for  $^{16}O$ , 2 for  $^{14}N$ ,  
40 and 2 for  $^{32}S$ , respectively. The double bond equivalents (DBE) were calculated as follows to  
41 estimate the unsaturation degree of each formula:  $DBE = (2c + 2 - h + n) / 2$ . The aromatic index (AI)  
42 which can reflect the degree of aromaticity were calculated following the equation:  $AI = (1 + c - 0.5o -$   
43  $s - 0.5h) / (c - 0.5o - s - n)$  (Koch and Dittmar, 2006; Kroll et al., 2011). There may be aromatic ring  
44 structures in the compounds if  $AI > 0.5$  and condensed aromatic structures may exist if  $AI \geq 0.67$ .  
45 The AI values were treated as zero if the calculated AI values were negative.

46 The relative intensity weighted elemental ratios, DBE, AI, and molecular weight were  
47 calculated following the equations (Jiang et al., 2020; Song et al., 2018):

$$48 \quad O/C_w = \frac{\sum(In_i * O/C_i)}{\sum In_i}$$

$$49 \quad H/C_w = \frac{\sum(In_i * H/C_i)}{\sum In_i}$$

$$50 \quad O/N_w = \frac{\sum(In_i * O/N_i)}{\sum In_i}$$

$$51 \quad O/S_w = \frac{\sum(In_i * O/S_i)}{\sum In_i}$$

$$52 \quad DBE_w = \frac{\sum(In_i * DBE_i)}{\sum In_i}$$

$$53 \quad DBE/C_w = \frac{\sum(In_i * DBE/C_i)}{\sum In_i}$$

$$54 \quad AI_w = \frac{\sum(In_i * AI_i)}{\sum In_i}$$

$$55 \quad MW_w = \frac{\sum(In_i * MW_i)}{\sum In_i}$$

56 Where  $In_i$  represents the intensity for each individual molecular formula and  $O/C_i$ ,  $H/C_i$ ,  $O/N_i$ ,  
57  $O/S_i$ ,  $DBE_i$ ,  $DBE/C_i$ ,  $AI_i$ , and  $MW_i$  represents the O/C, H/C, O/N, O/S, DBE, DBE/C, AI, and MW  
58 of the molecular formula i.

59 Table S1. Relative intensity weighted average values of number, molecular weight ( $MW_w$ ),  
 60 elemental ratios ( $O/C_w$ ,  $H/C_w$ ), double-bond equivalent ( $DBE_w$ ), aromaticity index ( $AI_w$ ), and  
 61  $DBE/C_w$  of different elemental category of assigned formulas in summer.

| Samples<br>(Sampling time) | Elemental<br>compositions | Number of Formulas | $MW_w$ | $O/C_w$ | $H/C_w$ | $DBE_w$ | $AI_w$ | $DBE/C_w$ |
|----------------------------|---------------------------|--------------------|--------|---------|---------|---------|--------|-----------|
| S1 (2017/8/20)             | Total                     | 2369               | 354.83 | 0.72    | 1.39    | 6.01    | 0.28   | 0.41      |
|                            | CHO                       | 537                | 376.37 | 0.47    | 1.20    | 8.52    | 0.28   | 0.46      |
|                            | CHON                      | 958                | 382.72 | 0.64    | 1.28    | 7.86    | 0.26   | 0.48      |
|                            | CHOS                      | 454                | 314.61 | 0.78    | 1.52    | 3.77    | 0.12   | 0.34      |
|                            | CHONS                     | 420                | 344.90 | 0.99    | 1.59    | 3.81    | 0.49   | 0.37      |
| S2 (2017/8/21)             | Total                     | 2151               | 336.51 | 0.80    | 1.46    | 4.92    | 0.28   | 0.39      |
|                            | CHO                       | 427                | 362.98 | 0.56    | 1.15    | 7.95    | 0.29   | 0.49      |
|                            | CHON                      | 598                | 353.76 | 0.71    | 1.23    | 7.38    | 0.33   | 0.52      |
|                            | CHOS                      | 566                | 314.26 | 0.76    | 1.53    | 3.73    | 0.13   | 0.34      |
|                            | CHONS                     | 560                | 337.01 | 0.98    | 1.65    | 3.49    | 0.39   | 0.35      |
| S3 (2017/8/22)             | Total                     | 3781               | 365.72 | 0.63    | 1.43    | 5.65    | 0.20   | 0.38      |
|                            | CHO                       | 750                | 384.47 | 0.48    | 1.24    | 7.86    | 0.26   | 0.44      |
|                            | CHON                      | 1308               | 397.69 | 0.59    | 1.26    | 7.85    | 0.28   | 0.48      |
|                            | CHOS                      | 919                | 335.46 | 0.60    | 1.54    | 4.13    | 0.09   | 0.32      |
|                            | CHONS                     | 804                | 362.69 | 0.82    | 1.60    | 4.01    | 0.22   | 0.34      |
| S4 (2017/8/23)             | Total                     | 4046               | 387.91 | 0.61    | 1.42    | 6.21    | 0.22   | 0.38      |
|                            | CHO                       | 889                | 396.83 | 0.45    | 1.30    | 7.72    | 0.23   | 0.40      |
|                            | CHON                      | 1722               | 424.46 | 0.57    | 1.32    | 7.87    | 0.23   | 0.44      |
|                            | CHOS                      | 785                | 352.12 | 0.60    | 1.53    | 4.30    | 0.08   | 0.31      |
|                            | CHONS                     | 650                | 362.31 | 0.88    | 1.60    | 3.96    | 0.34   | 0.35      |
| S5 (2017/8/24)             | Total                     | 3210               | 360.04 | 0.74    | 1.42    | 5.56    | 0.25   | 0.40      |
|                            | CHO                       | 682                | 387.23 | 0.54    | 1.22    | 7.79    | 0.24   | 0.45      |
|                            | CHON                      | 1176               | 396.78 | 0.65    | 1.27    | 7.64    | 0.26   | 0.48      |
|                            | CHOS                      | 677                | 323.09 | 0.75    | 1.50    | 3.99    | 0.10   | 0.35      |
|                            | CHONS                     | 675                | 350.81 | 0.94    | 1.57    | 3.98    | 0.41   | 0.37      |
| S6 (2017/8/25)             | Total                     | 1987               | 337.61 | 0.74    | 1.38    | 5.69    | 0.31   | 0.43      |
|                            | CHO                       | 528                | 368.39 | 0.54    | 1.17    | 8.07    | 0.28   | 0.48      |
|                            | CHON                      | 662                | 352.95 | 0.66    | 1.20    | 7.67    | 0.36   | 0.53      |
|                            | CHOS                      | 447                | 306.02 | 0.79    | 1.53    | 3.63    | 0.21   | 0.34      |
|                            | CHONS                     | 350                | 325.54 | 1.01    | 1.62    | 3.47    | 0.44   | 0.37      |

63 Table S2. Relative intensity weighted average values of number, molecular weight ( $MW_w$ ),  
 64 elemental ratios ( $O/C_w$ ,  $H/C_w$ ), double-bond equivalent ( $DBE_w$ ), aromaticity index ( $AI_w$ ), and  
 65  $DBE/C_w$  of different elemental category of assigned formulas in winter.

| Samples<br>(Sampling time)   | Elemental<br>compositions | Number of<br>Formulars | $MW_w$ | $O/C_w$ | $H/C_w$ | $DBE_w$ | $AI_w$ | $DBE/C_w$ |
|------------------------------|---------------------------|------------------------|--------|---------|---------|---------|--------|-----------|
| W1 (2017/12/31<br>daytinme)  | Total                     | 1890                   | 293.77 | 0.61    | 1.35    | 5.49    | 0.30   | 0.45      |
|                              | CHO                       | 299                    | 291.00 | 0.43    | 0.91    | 9.01    | 0.51   | 0.62      |
|                              | CHON                      | 587                    | 295.98 | 0.54    | 1.09    | 7.57    | 0.47   | 0.60      |
|                              | CHOS                      | 547                    | 282.56 | 0.65    | 1.69    | 2.72    | 0.04   | 0.26      |
|                              | CHONS                     | 457                    | 317.88 | 0.85    | 1.61    | 3.60    | 0.33   | 0.37      |
| W2 (2017/12/31<br>nighttime) | Total                     | 2366                   | 299.72 | 0.61    | 1.33    | 5.60    | 0.30   | 0.46      |
|                              | CHO                       | 428                    | 293.97 | 0.46    | 0.90    | 8.92    | 0.51   | 0.62      |
|                              | CHON                      | 725                    | 300.06 | 0.56    | 1.01    | 8.04    | 0.52   | 0.63      |
|                              | CHOS                      | 636                    | 288.71 | 0.64    | 1.66    | 2.92    | 0.05   | 0.27      |
| W3 (2018/1/1<br>daytime)     | CHONS                     | 577                    | 327.99 | 0.81    | 1.59    | 3.72    | 0.25   | 0.36      |
|                              | Total                     | 1598                   | 289.67 | 0.59    | 1.31    | 5.82    | 0.34   | 0.47      |
|                              | CHO                       | 256                    | 288.65 | 0.43    | 0.98    | 8.41    | 0.47   | 0.58      |
|                              | CHON                      | 477                    | 291.02 | 0.54    | 1.11    | 7.36    | 0.47   | 0.59      |
| W4 (2018/1/1<br>nighttime)   | CHOS                      | 520                    | 276.16 | 0.64    | 1.72    | 2.52    | 0.03   | 0.25      |
|                              | CHONS                     | 345                    | 314.40 | 0.89    | 1.66    | 3.30    | 0.36   | 0.35      |
|                              | Total                     | 1949                   | 310.34 | 0.66    | 1.41    | 5.24    | 0.29   | 0.42      |
|                              | CHO                       | 286                    | 310.40 | 0.42    | 0.94    | 9.39    | 0.50   | 0.60      |
| W5 (2018/1/8-<br>2018/1/9)   | CHON                      | 630                    | 310.82 | 0.56    | 1.09    | 8.10    | 0.52   | 0.60      |
|                              | CHOS                      | 512                    | 292.69 | 0.56    | 1.53    | 3.88    | 0.11   | 0.33      |
|                              | CHONS                     | 521                    | 324.66 | 0.86    | 1.64    | 3.51    | 0.25   | 0.35      |
|                              | Total                     | 2989                   | 294.64 | 0.67    | 1.40    | 5.14    | 0.31   | 0.43      |
| W6 (2018/1/19-<br>2018/1/20) | CHO                       | 564                    | 298.06 | 0.46    | 0.92    | 8.86    | 0.49   | 0.61      |
|                              | CHON                      | 1202                   | 313.36 | 0.55    | 1.05    | 8.15    | 0.49   | 0.61      |
|                              | CHOS                      | 625                    | 272.65 | 0.67    | 1.68    | 2.71    | 0.05   | 0.27      |
|                              | CHONS                     | 601                    | 308.76 | 0.94    | 1.63    | 3.47    | 0.43   | 0.37      |
| W6 (2018/1/19-<br>2018/1/20) | Total                     | 4939                   | 321.59 | 0.60    | 1.37    | 5.62    | 0.27   | 0.43      |
|                              | CHO                       | 878                    | 313.54 | 0.48    | 1.02    | 8.13    | 0.42   | 0.56      |
|                              | CHON                      | 1497                   | 331.31 | 0.52    | 1.00    | 8.74    | 0.51   | 0.62      |
|                              | CHOS                      | 1135                   | 296.52 | 0.60    | 1.71    | 2.78    | 0.04   | 0.24      |
|                              | CHONS                     | 1429                   | 345.52 | 0.76    | 1.58    | 4.08    | 0.19   | 0.36      |

67 Table S3. Classification basis of Van Krevelen diagram.

| Classes                      | H/C                     | O/C                   | AI             |
|------------------------------|-------------------------|-----------------------|----------------|
| Lipids-like                  | $1.7 < H/C \leq 2.2$    | $0 \leq O/C \leq 0.2$ | -              |
| Protein-like                 | $1.5 < H/C \leq 2.2$    | $0.2 < O/C \leq 0.6$  | -              |
| Lignins-like                 | $0.6 < H/C \leq 1.7$    | $0.1 \leq O/C < 0.6$  | $AI < 0.67$    |
| Carbohydrates-like           | $1.5 < H/C \leq 2.2$    | $0.6 < O/C < 1.2$     | -              |
| Tannins-like                 | $0.5 < H/C \leq 1.5$    | $0.6 < O/C \leq 1.2$  | $AI < 0.67$    |
| Unsaturated Hydrocarbons     | $0.7 < H/C \leq 1.5$    | $0 < O/C < 0.1$       | -              |
| Condensed aromatic structure | $0.2 \leq H/C \leq 0.6$ | $0 < O/C < 0.6$       | $AI \geq 0.67$ |

68

69 Table S4. Statistics on S-containing compounds based on O/S in summer.

| Samples                                                               | Number | O/C <sub>w</sub> | H/C <sub>w</sub> | DBE <sub>w</sub> | Number                                                                | O/C <sub>w</sub> | H/C <sub>w</sub> | DBE <sub>w</sub> |
|-----------------------------------------------------------------------|--------|------------------|------------------|------------------|-----------------------------------------------------------------------|------------------|------------------|------------------|
| CHOS with O/S<4                                                       |        |                  |                  |                  | CHOS with O/S≥4                                                       |                  |                  |                  |
| S1                                                                    | 13     | 0.61             | 1.15             | 9.74             | 441                                                                   | 0.78             | 1.53             | 3.68             |
| S2                                                                    | 11     | 0.66             | 1.58             | 4.37             | 555                                                                   | 0.76             | 1.53             | 3.72             |
| S3                                                                    | 34     | 0.34             | 1.61             | 5.54             | 885                                                                   | 0.60             | 1.53             | 4.11             |
| S4                                                                    | 73     | 0.24             | 1.58             | 7.24             | 712                                                                   | 0.61             | 1.53             | 4.19             |
| S5                                                                    | 28     | 0.45             | 1.30             | 7.63             | 649                                                                   | 0.75             | 1.51             | 3.94             |
| S6                                                                    | 13     | 0.36             | 1.56             | 6.26             | 434                                                                   | 0.65             | 1.69             | 2.69             |
| CHON <sub>1</sub> S with O/S<7 and<br>CHON <sub>2</sub> S with O/S<10 |        |                  |                  |                  | CHON <sub>1</sub> S with O/S≥7 and<br>CHON <sub>2</sub> S with O/S≥10 |                  |                  |                  |
| S1                                                                    | 47     | 0.70             | 1.25             | 4.74             | 373                                                                   | 1.00             | 1.60             | 3.77             |
| S2                                                                    | 56     | 0.72             | 1.39             | 3.76             | 504                                                                   | 0.99             | 1.66             | 3.48             |
| S3                                                                    | 138    | 0.63             | 1.34             | 4.42             | 666                                                                   | 0.84             | 1.63             | 3.98             |
| S4                                                                    | 83     | 0.71             | 1.28             | 4.35             | 567                                                                   | 0.89             | 1.61             | 3.94             |
| S5                                                                    | 99     | 0.71             | 1.35             | 4.28             | 576                                                                   | 0.96             | 1.59             | 3.96             |
| S6                                                                    | 41     | 0.77             | 1.28             | 4.11             | 309                                                                   | 1.03             | 1.64             | 3.43             |

70

71 Table S5. Statistics on S-containing compounds based on O/S in winter.

| Samples                                                               | Number | O/C <sub>w</sub> | H/C <sub>w</sub> | DBE <sub>w</sub> | Number                                                                | O/C <sub>w</sub> | H/C <sub>w</sub> | DBE <sub>w</sub> |
|-----------------------------------------------------------------------|--------|------------------|------------------|------------------|-----------------------------------------------------------------------|------------------|------------------|------------------|
| CHOS with O/S<4                                                       |        |                  |                  |                  | CHOS with O/S≥4                                                       |                  |                  |                  |
| W1                                                                    | 12     | 0.40             | 1.65             | 2.49             | 535                                                                   | 0.64             | 1.66             | 2.93             |
| W2                                                                    | 8      | 0.40             | 1.81             | 1.82             | 628                                                                   | 0.64             | 1.72             | 2.53             |
| W3                                                                    | 13     | 0.40             | 1.65             | 2.49             | 507                                                                   | 0.64             | 1.66             | 2.93             |
| W4                                                                    | 26     | 0.36             | 1.56             | 6.26             | 486                                                                   | 0.65             | 1.69             | 2.69             |
| W5                                                                    | 12     | 0.54             | 1.32             | 7.75             | 612                                                                   | 0.80             | 1.54             | 3.57             |
| W6                                                                    | 21     | 0.61             | 1.71             | 2.80             | 1114                                                                  | 0.40             | 1.91             | 1.49             |
| CHON <sub>1</sub> S with O/S<7 and<br>CHON <sub>2</sub> S with O/S<10 |        |                  |                  |                  | CHON <sub>1</sub> S with O/S≥7 and<br>CHON <sub>2</sub> S with O/S≥10 |                  |                  |                  |
| W1                                                                    | 121    | 0.64             | 1.32             | 4.54             | 336                                                                   | 0.90             | 1.68             | 3.37             |
| W2                                                                    | 134    | 0.65             | 1.26             | 4.80             | 443                                                                   | 0.83             | 1.65             | 3.53             |
| W3                                                                    | 79     | 0.64             | 1.31             | 4.56             | 266                                                                   | 0.93             | 1.72             | 3.08             |
| W4                                                                    | 110    | 0.61             | 1.30             | 4.71             | 411                                                                   | 0.89             | 1.68             | 3.36             |
| W5                                                                    | 131    | 0.65             | 1.31             | 4.49             | 469                                                                   | 0.98             | 1.68             | 3.32             |
| W6                                                                    | 386    | 0.63             | 1.30             | 4.95             | 1043                                                                  | 0.78             | 1.64             | 3.91             |

72







84

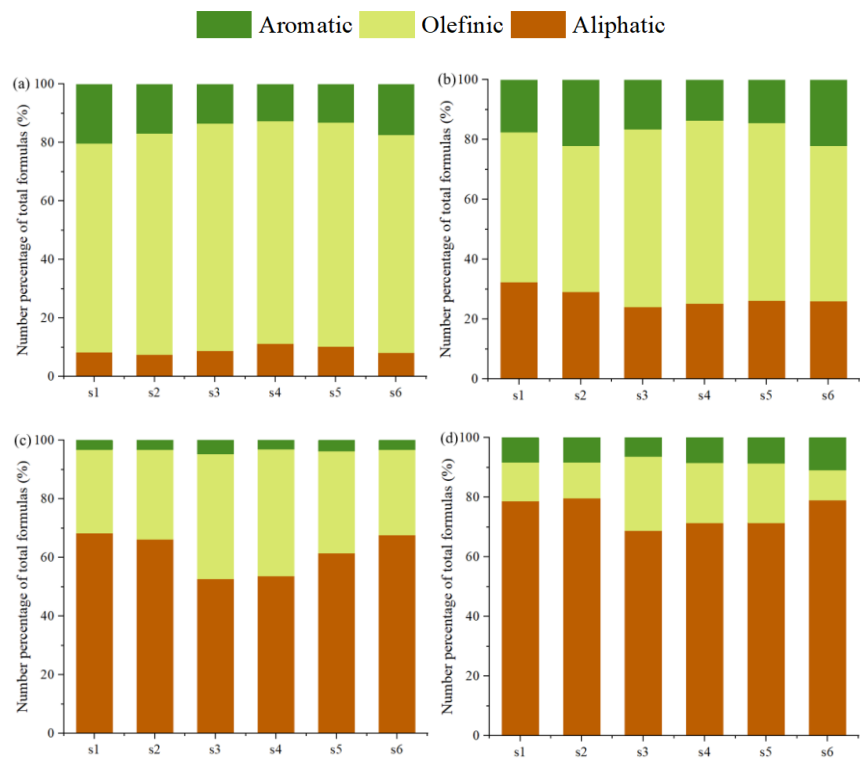

85

86

87 Figure S4. Number percentage of aliphatic (AI=0), olefinic ( $0 < AI \leq 0.5$ ) and aromatic ( $AI > 0.5$ )  
88 formulas in CHO, CHON, CHOS and CHONS compounds in summer.

89

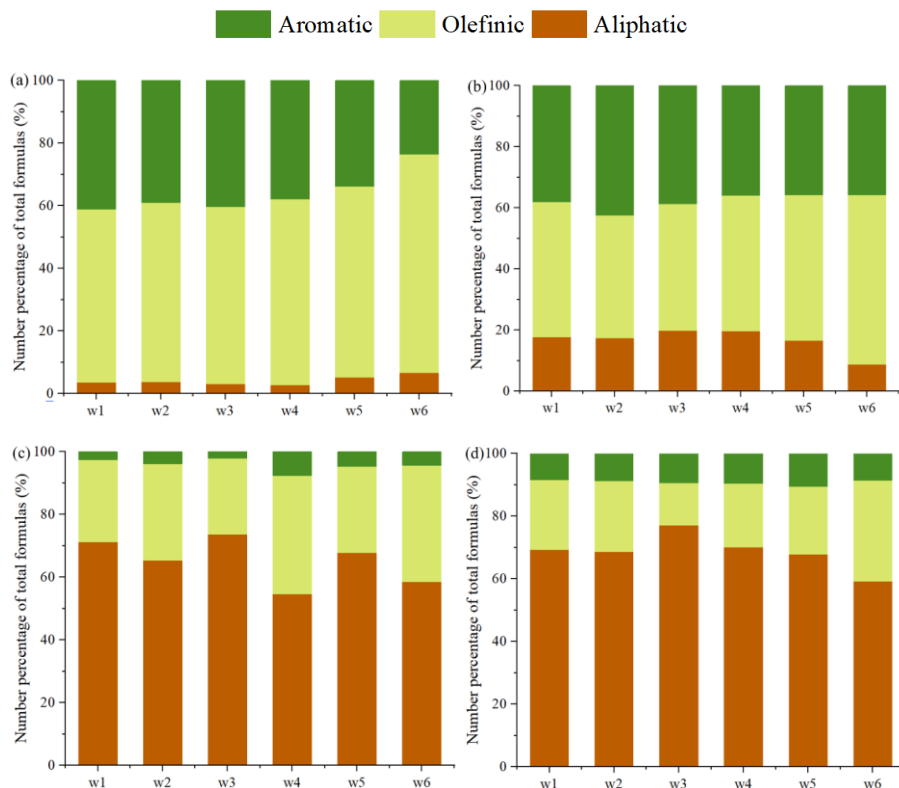

90

91

92 Figure S5. Number percentage of aliphatic (AI = 0), olefinic ( $0 < AI \leq 0.5$ ) and aromatic (AI > 0.5)  
93 formulas in CHO, CHON, CHOS and CHONS compounds in winter.

94

95

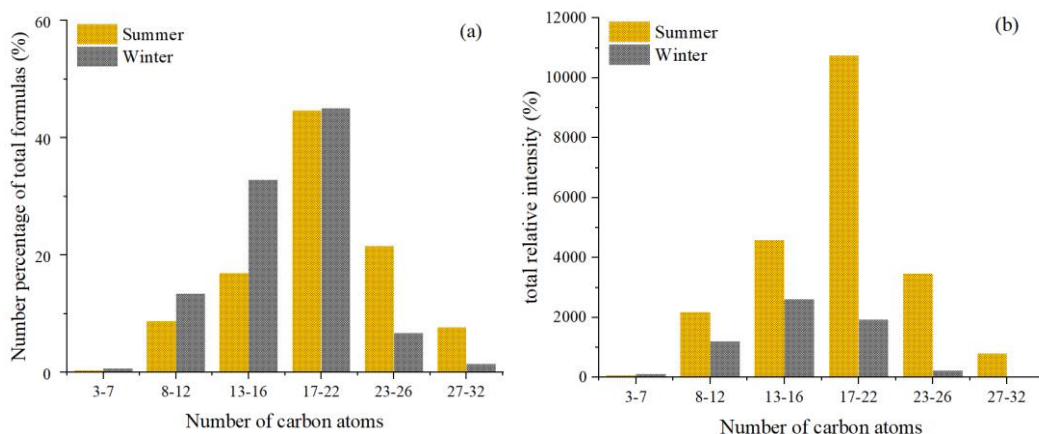

96

97 Figure S6. Number percentage of formulas for different carbon atom numbers (a) and total relative  
98 intensity of formulas for different carbon atom numbers (b) in CHO compounds in summer and  
99 winter.

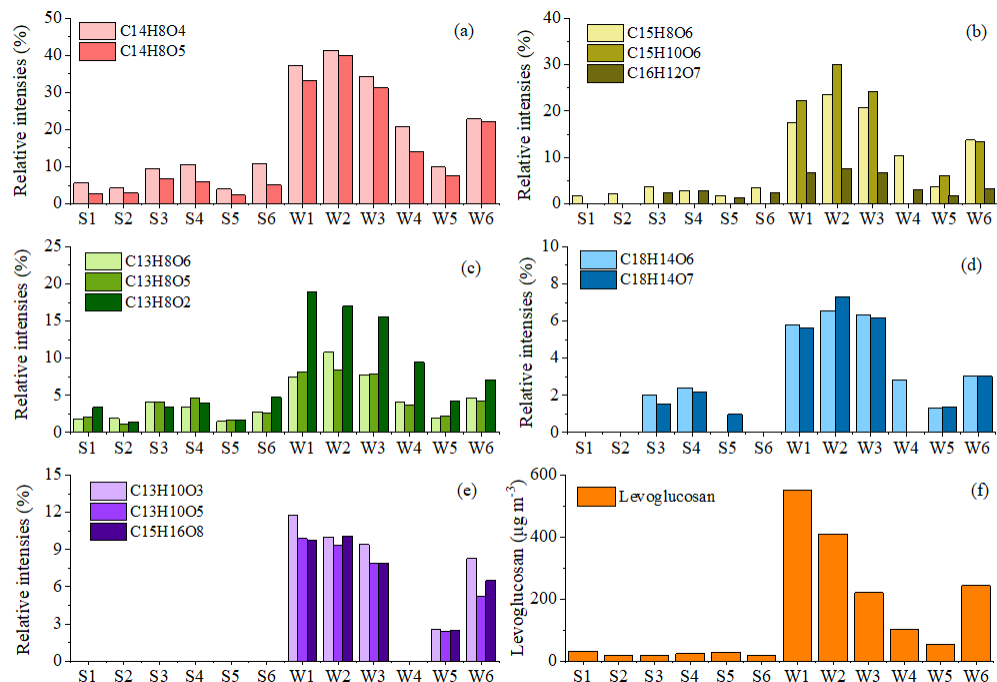

100  
 101 Figure S7. Time series of the relative intensities of typical CHO compounds in biomass burning  
 102 organic aerosols (BBOA) ((a), (b), (c), (d) and (e)) and the mass concentrations of levoglucosan  
 103 (f).

104  
 105

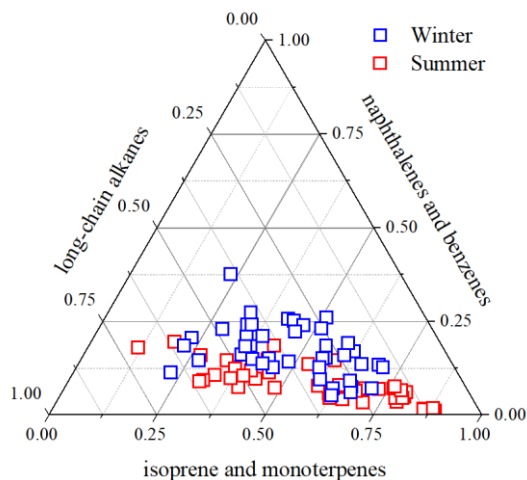

106  
 107 Figure S8. Distribution of the relative intensities of OSs from different precursors.

108 **References**

- 109  
110 Jiang, H., Li, J., Chen, D., Tang, J., Cheng, Z., Mo, Y., Su, T., Tian, C., Jiang, B., Liao, Y., and  
111 Zhang, G.: Biomass burning organic aerosols significantly influence the light absorption properties  
112 of polarity-dependent organic compounds in the Pearl River Delta Region, China, *Environ. Int.*,  
113 144, 106079, 10.1016/j.envint.2020.106079, 2020.
- 114 Koch, B. P., and Dittmar, T.: From mass to structure: an aromaticity index for high-resolution  
115 mass data of natural organic matter, *Rapid. Commun. Mass. Sp.*, 20, 926-932, 10.1002/rcm.2386,  
116 2006.
- 117 Kroll, J. H., Donahue, N. M., Jimenez, J. L., Kessler, S. H., Canagaratna, M. R., Wilson, K. R.,  
118 Altieri, K. E., Mazzoleni, L. R., Wozniak, A. S., Bluhm, H., Mysak, E. R., Smith, J. D., Kolb, C.  
119 E., and Worsnop, D. R.: Carbon oxidation state as a metric for describing the chemistry of  
120 atmospheric organic aerosol, *Nat. Chem.*, 3, 133-139, 10.1038/nchem.948, 2011.
- 121 Song, J., Li, M., Jiang, B., Wei, S., Fan, X., and Peng, P.: Molecular characterization of water-  
122 soluble humic like substances in smoke particles emitted from combustion of biomass materials  
123 and coal using ultrahigh-resolution electrospray ionization Fourier transform ion cyclotron  
124 resonance mass spectrometry, *Environ. Sci. Technol.*, 52, 2575-2585, 10.1021/acs.est.7b06126,  
125 2018.
